# Supplementary material for: Stabilized enzyme immobilization on micron-size PSt–GMA microspheres: different methods to improve the carriers' surface biocompatibility
Source: Royal Society of Chemistry journal article supplement (doi:10.1039/c6ra18126k), 2016-01-01
Supplement: c6ra18126k1.pdf [file c6ra18126k1.pdf]

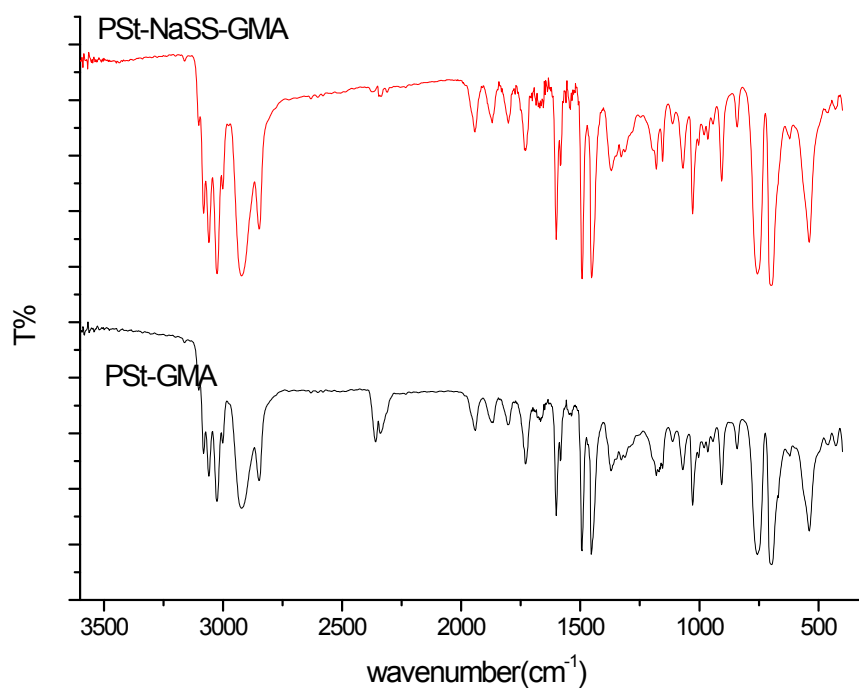

And in the spectrum of type PSt-GMA, adsorption bands at the wavenumbers at 914 and 846 cm<sup>-1</sup> were assigned to the epoxide groups. The adsorption peaks at 1729, 1185, and 1142 cm<sup>-1</sup> indicated the C=O stretching vibrations, C-O-O asymmetric stretching vibration, and C-O-O symmetric stretching vibration, respectively. These changes proved that glycidyl methacrylate had been incorporated into polystyrene.

In the spectrum of sampled, an obvious change was found at 1163 cm<sup>-1</sup>, and this was due to asymmetric stretching vibration of SO<sub>2</sub>. Thus sulfonate groups were detectable in sampled.
